# Supplementary material for: Screening for the primary prevention of fragility fractures among adults aged 40 years and older in primary care: systematic reviews of the effects and acceptability of screening and treatment, and the accuracy of risk prediction tools
Source: PubMed Central journal article supplement (PMC10029308; doi:10.1186/s13643-023-02181-w), 2023-03-21
Supplement: 13643_2023_2181_MOESM2_ESM.pdf [file 13643_2023_2181_MOESM2_ESM.pdf]

## Screening for the primary prevention of fragility fractures among adults aged 40 years and older in primary care: systematic reviews of the effects and acceptability of screening and treatment, and the accuracy of risk prediction tools

Authors: Michelle Gates, Jennifer Pillay (corresponding), Megan Nuspl, Aireen Wingert, Ben Vandermeer, Lisa Hartling  
 Affiliation: Alberta Research Centre for Health Evidence, Department of Pediatrics, University of Alberta. Edmonton Clinic Health Academy, 11405-87 Avenue NW, Edmonton, Alberta, Canada T6G 1C9. E-mail: MG: [michellegates85@gmail.com](mailto:michellegates85@gmail.com); JP: [jpillay@ualberta.ca](mailto:jpillay@ualberta.ca); MN: [megan.nuspl@ualberta.ca](mailto:megan.nuspl@ualberta.ca); AW: [awingert@ualberta.ca](mailto:awingert@ualberta.ca); BV: [ben.vandermeer@ualberta.ca](mailto:ben.vandermeer@ualberta.ca); LH: [hartling@ualberta.ca](mailto:hartling@ualberta.ca)

**Additional file 2.** Search strategies for KQ3b on the harms of pharmacologic treatment, from (i) systematic reviews and (ii) primary studies on rebound fractures after discontinuation of denosumab

### Systematic reviews

**Database:** Ovid MEDLINE(R) and Epub Ahead of Print, In-Process & Other Non-Indexed Citations and Daily 1946 to June 23, 2020

**Date:** 24 June 2020

### Search Strategy:

| #  | Searches                                                                                                                 | Results |
|----|--------------------------------------------------------------------------------------------------------------------------|---------|
| 1  | Alendronate/                                                                                                             | 3662    |
| 2  | Bone Density Conservation Agents/                                                                                        | 13808   |
| 3  | Denosumab/                                                                                                               | 1620    |
| 4  | Diphosphonates/                                                                                                          | 15951   |
| 5  | Osteoporosis/dt [Drug Therapy]                                                                                           | 9420    |
| 6  | Osteoporosis, Postmenopausal/dt [Drug Therapy]                                                                           | 4591    |
| 7  | Osteoporotic Fractures/pc [Prevention and control]                                                                       | 1556    |
| 8  | Risedronate Sodium/                                                                                                      | 1182    |
| 9  | alendron*.mp.                                                                                                            | 5505    |
| 10 | bisphosphonate*.mp.                                                                                                      | 17442   |
| 11 | denosumab*.mp.                                                                                                           | 3061    |
| 12 | diphosphonate*.mp.                                                                                                       | 19383   |
| 13 | risedron*.mp.                                                                                                            | 1995    |
| 14 | zoledron*.mp.                                                                                                            | 5328    |
| 15 | or/1-14 [Combined MeSH & text words for osteoporosis treatments]                                                         | 43682   |
| 16 | ae.fs. [adverse effects free-floating subheading]                                                                        | 1727258 |
| 17 | ci.fs. [chemically induced free-floating subheading]                                                                     | 585834  |
| 18 | co.fs. [complications free-floating subheading]                                                                          | 1968777 |
| 19 | to.fs. [toxicity free-floating subheading]                                                                               | 423665  |
| 20 | Risk/                                                                                                                    | 122023  |
| 21 | (adrs or safe or safety or side effect* or tolerability or toxicity or treatment emergent or undesirable effect*).ti,ab. | 1323033 |
| 22 | (adverse adj2 (effect or effects or event or events or outcome or outcomes or reaction or reactions)).ti,ab.             | 430669  |
| 23 | harm*.ti,ab.                                                                                                             | 180450  |

|    |                                                                                                                  |         |
|----|------------------------------------------------------------------------------------------------------------------|---------|
| 24 | or/16-23 [Combined free-floating subheadings, MeSH & text words for general harms]                               | 5246296 |
| 25 | Arrhythmias, Cardiac/ep, et, ci [Epidemiology, Etiology, Chemically Induced]                                     | 23995   |
| 26 | Atrial Fibrillation/ep, et, ci [Epidemiology, Etiology, Chemically Induced]                                      | 12955   |
| 27 | Cardiovascular Diseases/ep, et, ci [Epidemiology, Etiology, Chemically Induced]                                  | 65185   |
| 28 | Colorectal Neoplasms/ep, et, ci [Epidemiology, Etiology, Chemically Induced]                                     | 11238   |
| 29 | Esophageal Neoplasms/ep, et, ci [Epidemiology, Etiology, Chemically Induced]                                     | 6420    |
| 30 | Femoral Fractures/ep, et, ci [Epidemiology, Etiology, Chemically Induced]                                        | 2941    |
| 31 | Gastrointestinal Diseases/ep, et, ci [Epidemiology, Etiology, Chemically Induced]                                | 13291   |
| 32 | Jaw Diseases/ep, et, ci [Epidemiology, Etiology, Chemically Induced]                                             | 1576    |
| 33 | Osteonecrosis/ep, et, ci [Epidemiology, Etiology, Chemically Induced]                                            | 3713    |
| 34 | Musculoskeletal Pain/ep, et, ci [Epidemiology, Etiology, Chemically Induced]                                     | 1666    |
| 35 | exp Myocardial Ischemia/ep, et, ci [Epidemiology, Etiology, Chemically Induced]                                  | 96261   |
| 36 | Stomach Neoplasms/ep, et, ci [Epidemiology, Etiology, Chemically Induced]                                        | 10650   |
| 37 | Stroke/ep, et, ci [Epidemiology, Etiology, Chemically Induced]                                                   | 35319   |
| 38 | arrhythmia*.ti,ab.                                                                                               | 84361   |
| 39 | atrial fib*.ti,ab.                                                                                               | 69770   |
| 40 | ((cancer* or neoplasm*) adj3 (colon or colorectal* or esoph* or gastro* or rectal* or rectum or stomach)).ti,ab. | 208699  |
| 41 | (cardiovascular adj2 (death* or disease* or event*)).ti,ab.                                                      | 205474  |
| 42 | ((femoral* or femur*) adj2 fracture*).ti,ab.                                                                     | 17644   |
| 43 | ((infarct* or ischemi*) adj1 myocardial).ti,ab.                                                                  | 214966  |
| 44 | ((jaw or mandib*) adj3 (osteo-necro* or osteonecro*)).ti,ab.                                                     | 2517    |
| 45 | rash*.ti,ab.                                                                                                     | 30958   |
| 46 | stroke*.ti,ab.                                                                                                   | 245634  |
| 47 | or/25-46 [Combined MeSH & text words for established drug complications]                                         | 1092790 |
| 48 | or/24,47 [Combination of general & specific harms concepts]                                                      | 5913572 |
| 49 | and/15,48 [Combined concepts for osteoporosis treatments and harms]                                              | 20165   |
| 50 | Bisphosphonate-Associated Osteonecrosis of the Jaw/                                                              | 1202    |
| 51 | 49 or 50 [Combined coordinated concept & combined concepts for treatments and harms]                             | 20272   |
| 52 | limit 51 to systematic reviews                                                                                   | 417     |
| 53 | animals/ not humans/                                                                                             | 4676988 |
| 54 | 52 not 53 [Exclude animal studies]                                                                               | 416     |
| 55 | limit 54 to (english or french)                                                                                  | 411     |
| 56 | (2015* or 2016* or 2017* or 2018* or 2019* or 2020*).dt.                                                         | 6741761 |
| 57 | 55 and 56                                                                                                        | 200     |
| 58 | limit 55 to yr="2015-Current"                                                                                    | 205     |
| 59 | 57 or 58 [Date range limit applied]                                                                              | 207     |
| 60 | remove duplicates from 59                                                                                        | 206     |

**Database:** Wiley Cochrane Library (inception to present)

**Date:** 24 June 2020

**Search strategy:**

| ID | Search                                   | Hits |
|----|------------------------------------------|------|
| #1 | [mh ^Alendronate]                        | 732  |
| #2 | [mh ^"Bone Density Conservation Agents"] | 1548 |

|     |                                                                                                                                |        |
|-----|--------------------------------------------------------------------------------------------------------------------------------|--------|
| #3  | [mh ^Denosumab]                                                                                                                | 304    |
| #4  | [mh ^Diphosphonates]                                                                                                           | 1231   |
| #5  | [mh ^Osteoporosis/DT]                                                                                                          | 573    |
| #6  | [mh ^"Osteoporosis, Postmenopausal"/DT]                                                                                        | 1075   |
| #7  | [mh ^"Osteoporotic Fractures"/PC]                                                                                              | 147    |
| #8  | [mh ^"Risedronate Sodium"]]                                                                                                    | 250    |
| #9  | alendron*:ti,ab,kw                                                                                                             | 1546   |
| #10 | bisphosphonate*:ti,ab,kw                                                                                                       | 2257   |
| #11 | denosumab*:ti,ab,kw                                                                                                            | 928    |
| #12 | diphosphonate*:ti,ab,kw                                                                                                        | 1385   |
| #13 | risedron*:ti,ab,kw                                                                                                             | 719    |
| #14 | zoledron*:ti,ab,kw                                                                                                             | 1590   |
| #15 | {or #1-#14}                                                                                                                    | 6907   |
| #16 | MeSH descriptor: [] explode all trees and with qualifier(s): [adverse effects - AE]                                            | 127621 |
| #17 | MeSH descriptor: [] explode all trees and with qualifier(s): [chemically induced - CI]                                         | 23580  |
| #18 | MeSH descriptor: [] explode all trees and with qualifier(s): [complications - CO]                                              | 52939  |
| #19 | MeSH descriptor: [] explode all trees and with qualifier(s): [toxicity - TO]                                                   | 1629   |
| #20 | [mh ^Risk]                                                                                                                     | 3237   |
| #21 | (adrs or safe or safety or "side effect*" or tolerability or toxicity or treatment emergent or "undesirable effect*"):ti,ab,kw | 336391 |
| #22 | (adverse near/2 (effect or effects or event or events or outcome or outcomes or reaction or reactions)):ti,ab,kw               | 275950 |
| #23 | harm*:ti,ab,kw                                                                                                                 | 13601  |
| #24 | {or #16-#23}                                                                                                                   | 508121 |
| #25 | [mh ^"Arrhythmias, Cardiac"/EP,ET,CI]                                                                                          | 866    |
| #26 | [mh ^"Atrial Fibrillation"/EP,ET,CI]                                                                                           | 729    |
| #27 | [mh ^"Cardiovascular Diseases"/EP,ET,CI]                                                                                       | 2884   |
| #28 | [mh ^"Colorectal Neoplasms"/EP,ET,CI]                                                                                          | 272    |
| #29 | [mh ^"Esophageal Neoplasms"/EP,ET,CI]                                                                                          | 43     |
| #30 | [mh ^"Femoral Fractures"/EP,ET,CI]                                                                                             | 22     |
| #31 | [mh ^"Gastrointestinal Diseases"/EP,ET,CI]                                                                                     | 896    |
| #32 | [mh ^"Jaw Diseases"/EP,ET,CI]                                                                                                  | 14     |
| #33 | [mh ^Osteonecrosis/EP,ET,CI]                                                                                                   | 44     |
| #34 | [mh ^"Musculoskeletal Pain"/EP,ET,CI]                                                                                          | 110    |
| #35 | [mh ^"Stomach Neoplasms"/EP,ET,CI]                                                                                             | 74     |
| #36 | [mh ^Stroke/EP,ET,CI]                                                                                                          | 1669   |
| #37 | arrhythmia*:ti,ab                                                                                                              | 7799   |
| #38 | "atrial fib*":ti,ab                                                                                                            | 4      |
| #39 | ((cancer* or neoplasm*) near/3 (colon or colorectal* or esoph* or gastro* or rectal* or rectum or stomach)):ti,ab              | 20623  |
| #40 | (cardiovascular near/2 (death* or disease* or event*)):ti,ab                                                                   | 29814  |
| #41 | ((femoral* or femur*) near/2 fracture*):ti,ab                                                                                  | 1724   |
| #42 | ((infarct* or ischemi*) near/1 myocardial):ti,ab                                                                               | 29742  |
| #43 | ((jaw or mandib*) near/3 ("osteonecros*" or osteonecros*)):ti,ab                                                               | 229    |
| #44 | rash*:ti,ab                                                                                                                    | 4850   |
| #45 | stroke*:ti,ab                                                                                                                  | 49759  |
| #46 | {or #25-#45}                                                                                                                   | 129492 |
| #47 | #24 or #46                                                                                                                     | 586183 |
| #48 | #15 and #47                                                                                                                    | 3654   |

|     |                                                                                                                          |                               |
|-----|--------------------------------------------------------------------------------------------------------------------------|-------------------------------|
| #49 | [mh ^"Bisphosphonate-Associated Osteonecrosis of the Jaw"]                                                               | 21                            |
| #50 | #48 or #49                                                                                                               | 3654                          |
| #51 | #48 or #49 with Publication Year from 2015 to 2020, with Cochrane Library publication date Between Jan 2015 and Jul 2020 | 19 (17 reviews / 2 protocols) |

**Other Source:** PROSPERO

**Platform/URL:** <https://www.crd.york.ac.uk/prospéro/>

**Date:** 24 June 2020

**Strategy:**

(alendron\* OR denosumab\* OR disphosphonate\* OR risedron\* OR zolendron\*) AND ("adverse effect\*" OR "adverse event\*" OR "adverse outcome\*" OR complicat\* OR harm\* OR risk\* OR safe OR safety) (112)

**Other Source:** EPISTEMONIKOS

**Platform/URL:** <https://www.epistemonikos.org>

**Date:** 24 June 2020

**Strategy:**

(alendron\* OR denosumab\* OR disphosphonate\* OR risedron\* OR zolendron\*) AND ("adverse effect\*" OR "adverse event\*" OR "adverse outcome\*" OR complicat\* OR harm\* OR risk\* OR safe OR safety)

Filters:

Publication year: 2015 to 2020

Publication type: Systematic Review (163)

### Primary studies on rebound fractures from discontinuation of denosumab

Ovid MEDLINE(R) ALL <1946 to June 18, 2021>

| # | Searches                          | Results |
|---|-----------------------------------|---------|
| 1 | Bone Density Conservation Agents/ | 14670   |
| 2 | Denosumab/ or 4EQZ6YO2HI.rn.      | 1859    |
| 3 | (amg162 or amg-162).tw,kf.        | 38      |
| 4 | denosumab.tw,kf.                  | 3273    |
| 5 | dmab.tw,kf.                       | 471     |
| 6 | prolia.tw,kf.                     | 52      |
| 7 | xgeva.tw,kf.                      | 28      |
| 8 | or/1-7                            | 17000   |
| 9 | Deprescriptions/                  | 619     |

|    |                                              |        |
|----|----------------------------------------------|--------|
| 10 | Drug Administration Schedule/                | 101965 |
| 11 | Withholding Treatment/                       | 12286  |
| 12 | ceas*.tw,kf.                                 | 25171  |
| 13 | cessation.tw,kf.                             | 78183  |
| 14 | (deprescri* or de-prescri*).tw,kf.           | 1345   |
| 15 | (discontin* or dis-continu*).tw,kf.          | 134782 |
| 16 | holiday*.tw,kf.                              | 5762   |
| 17 | stop*.tw,kf.                                 | 140187 |
| 18 | withdraw*.tw,kf.                             | 132161 |
| 19 | withhold*.tw,kf.                             | 8361   |
| 20 | or/9-19                                      | 588245 |
| 21 | 8 and 20                                     | 1867   |
| 22 | limit 21 to (comment or editorial or letter) | 71     |
| 23 | 21 not 22                                    | 1796   |
| 24 | limit 23 to yr="2020 -Current"               | 182    |
| 25 | limit 24 to (english or french)              | 178    |
| 26 | remove duplicates from 25                    | 177    |

#### Embase <1974 to 2021 June 18>

| # | Searches                         | Results |
|---|----------------------------------|---------|
| 1 | bone density conservation agent/ | 3732    |
| 2 | denosumab/ or 615258-40-7.rn.    | 10081   |
| 3 | (amg162 or amg-162).tw,kw.       | 248     |
| 4 | denosumab.tw,kw.                 | 6396    |
| 5 | dmab.tw,kw.                      | 892     |

|    |                                                                                                             |        |
|----|-------------------------------------------------------------------------------------------------------------|--------|
| 6  | prolia.tw,kw.                                                                                               | 428    |
| 7  | xgeva.tw,kw.                                                                                                | 298    |
| 8  | or/1-7                                                                                                      | 14364  |
| 9  | deprescription/                                                                                             | 635    |
| 10 | drug withdrawal/                                                                                            | 212735 |
| 11 | treatment withdrawal/                                                                                       | 20569  |
| 12 | ceas*.tw,kw.                                                                                                | 32385  |
| 13 | cessation.tw,kw.                                                                                            | 105493 |
| 14 | (deprescri* or de-prescri*).tw,kw.                                                                          | 1857   |
| 15 | (discontin* or dis-contin*).tw,kw.                                                                          | 221242 |
| 16 | holiday*.tw,kw.                                                                                             | 8604   |
| 17 | stop*.tw,kw.                                                                                                | 211219 |
| 18 | withdraw*.tw,kw.                                                                                            | 186305 |
| 19 | withhold*.tw,kw.                                                                                            | 11157  |
| 20 | or/9-19                                                                                                     | 853036 |
| 21 | 8 and 20                                                                                                    | 1879   |
| 22 | limit 21 to (conference abstract or conference paper or "conference review" or editorial or letter or note) | 664    |
| 23 | 21 not 22                                                                                                   | 1215   |
| 24 | limit 23 to yr="2020 -Current"                                                                              | 239    |
| 25 | limit 24 to (english or french)                                                                             | 235    |
| 26 | remove duplicates from 25                                                                                   | 231    |

**Strategy: Cochrane**

| ID | SEARCH                       | HITS |
|----|------------------------------|------|
| #1 | (amg162 or amg-162):ti,ab,kw | 54   |
| #2 | denosumab:ti,ab,kw           | 1074 |

|     |                                                                            |        |
|-----|----------------------------------------------------------------------------|--------|
| #3  | dmab:ti,ab,kw                                                              | 142    |
| #4  | prolia:ti,ab,kw                                                            | 55     |
| #5  | xgeva:ti,ab,kw                                                             | 26     |
| #6  | {OR #1-#5}                                                                 | 1089   |
| #7  | ceas*:ti,ab,kw                                                             | 1962   |
| #8  | cessation:ti,ab,kw                                                         | 17443  |
| #9  | (deprescri* or de-prescri*):ti,ab,kw                                       | 270    |
| #10 | (discontinuu* or dis-continuu*):ti,ab,kw                                   | 39138  |
| #11 | holiday*:ti,ab,kw                                                          | 547    |
| #12 | stop*:ti,ab,kw                                                             | 25095  |
| #13 | withdraw*:ti,ab,kw                                                         | 44772  |
| #14 | withhold*:ti,ab,kw                                                         | 1255   |
| #15 | {OR #7-#14}                                                                | 110888 |
| #16 | #6 AND #15                                                                 | 172    |
| #17 | #6 and #15 with Publication Year from 2020 to present, in Trials           | 18     |
| #18 | #6 and #15 with Cochrane Library publication date from Jan 2020 to present | 35     |
| #19 | #17 OR #18                                                                 | 35     |
