# Supplementary material for: Screening for the primary prevention of fragility fractures among adults aged 40 years and older in primary care: systematic reviews of the effects and acceptability of screening and treatment, and the accuracy of risk prediction tools
Source: PubMed Central journal article supplement (PMC10029308; doi:10.1186/s13643-023-02181-w), 2023-03-21
Supplement: 13643_2023_2181_MOESM7_ESM.pdf [file 13643_2023_2181_MOESM7_ESM.pdf]

**Screening for the primary prevention of fragility fractures among adults aged 40 years and older in primary care: systematic reviews of the effects and acceptability of screening and treatment, and the accuracy of risk prediction tools**

Michelle Gates, Jennifer Pillay (corresponding), Megan Nuspl, Aireen Wingert, Ben Vandermeer, Lisa Hartling

**Affiliation:** Alberta Research Centre for Health Evidence, Department of Pediatrics, University of Alberta. Edmonton Clinic Health Academy, 11405-87 Avenue NW, Edmonton, Alberta, Canada T6G 1C9. E-mail: MG:

[michellegates85@gmail.com](mailto:michellegates85@gmail.com); JP: [jpillay@ualberta.ca](mailto:jpillay@ualberta.ca); MN: [megan.nuspl@ualberta.ca](mailto:megan.nuspl@ualberta.ca); AW: [awingert@ualberta.ca](mailto:awingert@ualberta.ca); BV: [ben.vandermeer@ualberta.ca](mailto:ben.vandermeer@ualberta.ca); LH: [hartling@ualberta.ca](mailto:hartling@ualberta.ca)

**Additional file 7.** Risk of bias assessments

**Additional Table 7.1.** Risk of bias assessments for studies included in KQ2 on the predictive accuracy of screening tests

| Study           | Tool      | Domain 1. Participants |                 |              |               | Domain 2. Predictors |              |                |                     |                   |              |               | Domain 3. Outcomes       |                          |                |                         |                        |                            |              | Domain 4. Analysis |               |                         |                         |                        |                          |                           |                          | Overall Appraisal           |                              |                             |                              |              |              |               |
|-----------------|-----------|------------------------|-----------------|--------------|---------------|----------------------|--------------|----------------|---------------------|-------------------|--------------|---------------|--------------------------|--------------------------|----------------|-------------------------|------------------------|----------------------------|--------------|--------------------|---------------|-------------------------|-------------------------|------------------------|--------------------------|---------------------------|--------------------------|-----------------------------|------------------------------|-----------------------------|------------------------------|--------------|--------------|---------------|
|                 |           | 1.1 Data sources       | 1.2 Eligibility | Risk of bias | Applicability | 2.1 Definitions      | 2.2 Blinding | 2.3a Available | 2.3b Collected/used | 2.3c Missing data | Risk of bias | Applicability | 3.1a Determination (CFF) | 3.1b Determination (hip) | 3.2 Definition | 3.3 Predictors excluded | 3.4 Similar definition | 3.5 Knowledge of predictor | 3.6 Interval | Risk of Bias       | Applicability | 4.1a No. outcomes (hip) | 4.1b No. outcomes (CFF) | 4.2 Predictor handling | 4.3 Missing participants | 4.4 Deaths/competing risk | 4.5 Complexities in data | 4.6a Performance data (hip) | 4.6b Calibration plots (hip) | 4.6c Performance data (CFF) | 4.6d Calibration plots (CFF) | Risk of Bias | Risk of Bias | Applicability |
| Azagra 2016a    | FRAX      | Y                      | Y               | ●Low         | ●High         | Y                    | NI           | Y              | Y                   | NI                | ●Unclear     | ●Low          | Y                        | Y                        | Y              | Y                       | NI                     | Y                          | ●Low         | ●Low               | N             | Y                       | PY                      | N                      | N                        | N                         | Y                        | Y                           | Y                            | Y                           | ●High                        | ●High        | ●High        |               |
| Azagra 2016b    | FRAX      | Y                      | Y               | ●Low         | ●Low          | NI                   | NI           | Y              | NI                  | NI                | ●Unclear     | ●Low          | Y                        | NA                       | Y              | Y                       | Y                      | NI                         | Y            | ●Low               | ●Low          | NA                      | Y                       | NI                     | N                        | N                         | NA                       | NA                          | PY                           | N                           | ●High                        | ●High        | ●Low         |               |
| Bolland 2011    | FRAX      | Y                      | Y               | ●Low         | ●Low          | Y                    | NI           | Y              | Y                   | NI                | ●Unclear     | ●Low          | N                        | Y                        | Y              | Y                       | N                      | NI                         | Y            | ●High              | ●Low          | N                       | Y                       | NI                     | Y                        | N                         | N                        | Y                           | Y                            | Y                           | Y                            | ●High        | ●High        | ●Low          |
|                 | Garvan    | Y                      | Y               | ●Low         | ●Low          | Y                    | NI           | Y              | Y                   | NI                | ●Unclear     | ●Low          | N                        | Y                        | Y              | Y                       | N                      | NI                         | Y            | ●High              | ●Low          | N                       | Y                       | NI                     | Y                        | N                         | N                        | Y                           | Y                            | Y                           | Y                            | ●High        | ●High        | ●Low          |
| Crandall 2019a  | FRAX      | Y                      | Y               | ●Low         | ●High         | N                    | NI           | Y              | Y                   | PY                | ●Unclear     | ●Low          | PN                       | Y                        | Y              | Y                       | Y                      | NI                         | Y            | ●Unclear           | ●Low          | Y                       | Y                       | PN                     | Y                        | Y                         | Y                        | Y                           | Y                            | Y                           | Y                            | ●Unclear     | ●Unclear     | ●High         |
| Crandall 2019b  | FRAX      | Y                      | Y               | ●Low         | ●High         | Y                    | NI           | Y              | Y                   | PY                | ●Unclear     | ●Low          | N                        | Y                        | Y              | Y                       | Y                      | NI                         | Y            | ●Unclear           | ●Low          | Y                       | Y                       | Y                      | N                        | N                         | N                        | Y                           | N                            | N                           | N                            | ●High        | ●High        | ●High         |
| Crandall 2019b  | Garvan    | Y                      | Y               | ●Low         | ●High         | Y                    | NI           | Y              | Y                   | PY                | ●Unclear     | ●Low          | N                        | Y                        | Y              | Y                       | Y                      | NI                         | Y            | ●Unclear           | ●Low          | Y                       | Y                       | Y                      | N                        | N                         | N                        | Y                           | N                            | N                           | N                            | ●High        | ●High        | ●High         |
| Czerwinski 2013 | FRAX      | PY                     | Y               | ●Low         | ●High         | Y                    | NI           | Y              | Y                   | Y                 | ●Low         | ●Low          | N                        | Y                        | Y              | Y                       | Y                      | NI                         | PY           | ●High              | ●Low          | N                       | Y                       | Y                      | N                        | N                         | N                        | Y                           | N                            | Y                           | N                            | ●High        | ●High        | ●High         |
| Dagan 2017      | FRAX      | Y                      | Y               | ●Low         | ●Unclear      | Y                    | NI           | Y              | Y                   | Y                 | ●Low         | ●Low          | PN                       | Y                        | Y              | Y                       | Y                      | NI                         | Y            | ●Unclear           | ●Low          | Y                       | Y                       | PN                     | Y                        | Y                         | N                        | Y                           | Y                            | N                           | N                            | ●High        | ●High        | ●Unclear      |
|                 | Garvan    | Y                      | Y               | ●Low         | ●Unclear      | Y                    | NI           | Y              | Y                   | Y                 | ●Low         | ●Low          | PN                       | Y                        | Y              | Y                       | Y                      | NI                         | Y            | ●Unclear           | ●Low          | Y                       | NA                      | PN                     | Y                        | Y                         | N                        | Y                           | Y                            | NA                          | NA                           | ●High        | ●High        | ●Unclear      |
|                 | QFracture | Y                      | Y               | ●Low         | ●Unclear      | Y                    | NI           | Y              | Y                   | Y                 | ●Low         | ●Low          | PN                       | Y                        | Y              | Y                       | Y                      | NI                         | Y            | ●Unclear           | ●Low          | Y                       | Y                       | PN                     | Y                        | Y                         | N                        | Y                           | Y                            | N                           | N                            | ●High        | ●High        | ●Unclear      |

| Study            | Tool      | Domain 1. Participants |                 |              |               | Domain 2. Predictors |              |                |                     |                   |              |               | Domain 3. Outcomes       |                          |                |                         |                        |                            |              | Domain 4. Analysis |               |                         |                         |                        |                          |                           |                          | Overall Appraisal           |                              |                             |                              |              |              |               |
|------------------|-----------|------------------------|-----------------|--------------|---------------|----------------------|--------------|----------------|---------------------|-------------------|--------------|---------------|--------------------------|--------------------------|----------------|-------------------------|------------------------|----------------------------|--------------|--------------------|---------------|-------------------------|-------------------------|------------------------|--------------------------|---------------------------|--------------------------|-----------------------------|------------------------------|-----------------------------|------------------------------|--------------|--------------|---------------|
|                  |           | 1.1 Data sources       | 1.2 Eligibility | Risk of bias | Applicability | 2.1 Definitions      | 2.2 Blinding | 2.3a Available | 2.3b Collected/used | 2.3c Missing data | Risk of bias | Applicability | 3.1a Determination (CFF) | 3.1b Determination (hip) | 3.2 Definition | 3.3 Predictors excluded | 3.4 Similar definition | 3.5 Knowledge of predictor | 3.6 Interval | Risk of Bias       | Applicability | 4.1a No. outcomes (hip) | 4.1b No. outcomes (CFF) | 4.2 Predictor handling | 4.3 Missing participants | 4.4 Deaths/competing risk | 4.5 Complexities in data | 4.6a Performance data (hip) | 4.6b Calibration plots (hip) | 4.6c Performance data (CFF) | 4.6d Calibration plots (CFF) | Risk of Bias | Risk of Bias | Applicability |
| Desbiens 2020    | FRAX      | Y                      | Y               | ●Low         | ●Low          | Y                    | NI           | N              | PY                  | N                 | ●Unclear     | ●Low          | NI                       | NA                       | Y              | Y                       | Y                      | NI                         | Y            | ●Unclear           | ●Low          | NA                      | Y                       | PN                     | PY                       | N                         | N                        | NA                          | NA                           | Y                           | Y                            | ●High        | ●High        | ●Low          |
|                  | Garvan    | Y                      | Y               | ●Low         | ●Low          | Y                    | NI           | N              | PY                  | N                 | ●Unclear     | ●Low          | NI                       | NA                       | Y              | Y                       | Y                      | NI                         | Y            | ●Unclear           | ●Low          | NA                      | Y                       | PN                     | PY                       | N                         | N                        | NA                          | NA                           | Y                           | Y                            | ●High        | ●High        | ●Low          |
|                  | QFracture | Y                      | Y               | ●Low         | ●Low          | Y                    | NI           | N              | PY                  | N                 | ●Unclear     | ●Low          | NI                       | NA                       | Y              | Y                       | Y                      | NI                         | Y            | ●Unclear           | ●Low          | NA                      | Y                       | PN                     | PY                       | N                         | N                        | NA                          | NA                           | Y                           | Y                            | ●High        | ●High        | ●Low          |
| Ettinger 2012    | FRAX      | Y                      | Y               | ●Low         | ●High         | Y                    | NI           | Y              | Y                   | N                 | ●High        | ●Low          | Y                        | Y                        | Y              | Y                       | Y                      | NI                         | PY           | ●Low               | ●Low          | Y                       | Y                       | Y                      | N                        | N                         | N                        | Y                           | Y                            | Y                           | PY                           | ●High        | ●High        | ●High         |
| Ettinger 2013    | FRAX      | Y                      | Y               | ●Low         | ●High         | Y                    | NI           | Y              | N                   | PN                | ●High        | ●Low          | Y                        | Y                        | Y              | Y                       | Y                      | NI                         | PY           | ●High              | ●High         | Y                       | Y                       | Y                      | N                        | Y                         | PN                       | Y                           | Y                            | Y                           | PY                           | ●High        | ●High        | ●High         |
| Fraser 2011      | FRAX      | Y                      | Y               | ●Low         | ●Unclear      | N                    | NI           | Y              | Y                   | NI                | ●Unclear     | ●Low          | PY                       | Y                        | Y              | Y                       | Y                      | Y                          | Y            | ●Unclear           | ●Low          | Y                       | Y                       | PY                     | Y                        | Y                         | Y                        | Y                           | Y                            | Y                           | Y                            | ●Unclear     | ●Unclear     | ●Unclear      |
| Goldshstein 2018 | FRAX      | Y                      | Y               | ●Low         | ●High         | Y                    | NI           | Y              | PY                  | Y                 | ●Low         | ●Low          | PN                       | Y                        | Y              | Y                       | Y                      | NI                         | Y            | ●Unclear           | ●Low          | Y                       | Y                       | N                      | Y                        | Y                         | N                        | Y                           | PY                           | Y                           | PY                           | ●High        | ●High        | ●High         |
| Gourlay 2017     | FRAX      | Y                      | Y               | ●Low         | ●Low          | NI                   | NI           | Y              | NI                  | N                 | ●High        | ●Low          | Y                        | Y                        | Y              | Y                       | Y                      | NI                         | N            | ●High              | ●Low          | Y                       | Y                       | PY                     | NI                       | Y                         | N                        | PY                          | Y                            | N                           | N                            | ●High        | ●High        | ●Low          |
|                  | Garvan    | Y                      | Y               | ●Low         | ●Low          | NI                   | NI           | Y              | NI                  | N                 | ●High        | ●Low          | Y                        | Y                        | Y              | Y                       | Y                      | NI                         | N            | ●High              | ●Low          | Y                       | Y                       | PY                     | NI                       | Y                         | N                        | PY                          | Y                            | N                           | N                            | ●High        | ●High        | ●Low          |
|                  | QFracture | Y                      | Y               | ●Low         | ●Low          | NI                   | NI           | Y              | NI                  | N                 | ●High        | ●Low          | Y                        | Y                        | Y              | Y                       | Y                      | NI                         | N            | ●High              | ●Low          | Y                       | Y                       | PY                     | NI                       | Y                         | N                        | PY                          | Y                            | N                           | N                            | ●High        | ●High        | ●Low          |
| Holloway 2018    | FRAX      | Y                      | Y               | ●Low         | ●Low          | Y                    | NI           | Y              | Y                   | Y                 | ●Low         | ●Low          | PN                       | Y                        | Y              | Y                       | Y                      | NI                         | Y            | ●Unclear           | ●Low          | N                       | N                       | Y                      | Y                        | Y                         | N                        | Y                           | N                            | Y                           | N                            | ●High        | ●High        | ●Low          |
| Iki 2015         | FRAX      | Y                      | Y               | ●Low         | ●High         | Y                    | NI           | Y              | Y                   | Y                 | ●Low         | ●Low          | N                        | NA                       | Y              | Y                       | Y                      | NI                         | N            | ●High              | ●Low          | NA                      | N                       | N                      | PY                       | NI                        | N                        | NA                          | NA                           | Y                           | PY                           | ●High        | ●High        | ●Unclear      |
| Langsetmo 2011   | Garvan    | Y                      | Y               | ●Low         | ●Low          | Y                    | NI           | Y              | Y                   | NI                | ●Unclear     | ●Low          | PN                       | Y                        | Y              | Y                       | N                      | NI                         | PY           | ●High              | ●Low          | N                       | Y                       | PN                     | NI                       | Y                         | N                        | Y                           | Y                            | Y                           | Y                            | ●High        | ●High        | ●Low          |
| Leslie 2016      | FRAX      | Y                      | Y               | ●Low         | ●High         | N                    | NI           | Y              | Y                   | Y                 | ●Unclear     | ●Low          | PN                       | NA                       | Y              | Y                       | Y                      | NI                         | Y            | ●Unclear           | ●Low          | NA                      | Y                       | PN                     | Y                        | Y                         | Y                        | NA                          | NA                           | Y                           | PY                           | ●Unclear     | ●Unclear     | ●High         |
|                  | CAROC     | Y                      | Y               | ●Low         | ●High         | N                    | NI           | Y              | Y                   | Y                 | ●Unclear     | ●Low          | PN                       | NA                       | Y              | Y                       | Y                      | NI                         | Y            | ●Unclear           | ●Low          | NA                      | Y                       | Y                      | Y                        | Y                         | Y                        | NA                          | NA                           | Y                           | PY                           | ●Unclear     | ●Unclear     | ●High         |
| Leslie 2017b     | FRAX      | Y                      | Y               | ●Low         | ●High         | N                    | NI           | Y              | Y                   | PY                | ●Unclear     | ●Low          | PN                       | Y                        | Y              | Y                       | Y                      | NI                         | PY           | ●Unclear           | ●Low          | Y                       | Y                       | N                      | Y                        | Y                         | Y                        | PY                          | Y                            | PY                          | Y                            | ●Unclear     | ●Unclear     | ●High         |
| Li 2015          | FRAX      | Y                      | Y               | ●Low         | ●Unclear      | Y                    | NI           | Y              | Y                   | N                 | ●High        | ●Low          | N                        | Y                        | Y              | Y                       | Y                      | NI                         | N            | ●High              | ●Low          | NA                      | Y                       | NI                     | PY                       | N                         | N                        | NA                          | NA                           | Y                           | N                            | ●High        | ●High        | ●Unclear      |

| Study                | Tool   | Domain 1. Participants |                 |              |               | Domain 2. Predictors |              |                |                     |                   |              |               | Domain 3. Outcomes       |                          |                |                         |                        |                            |              | Domain 4. Analysis |               |                         |                         |                        |                          |                           |                          | Overall Appraisal           |                              |                             |                              |              |              |               |
|----------------------|--------|------------------------|-----------------|--------------|---------------|----------------------|--------------|----------------|---------------------|-------------------|--------------|---------------|--------------------------|--------------------------|----------------|-------------------------|------------------------|----------------------------|--------------|--------------------|---------------|-------------------------|-------------------------|------------------------|--------------------------|---------------------------|--------------------------|-----------------------------|------------------------------|-----------------------------|------------------------------|--------------|--------------|---------------|
|                      |        | 1.1 Data sources       | 1.2 Eligibility | Risk of bias | Applicability | 2.1 Definitions      | 2.2 Blinding | 2.3a Available | 2.3b Collected/used | 2.3c Missing data | Risk of bias | Applicability | 3.1a Determination (CFF) | 3.1b Determination (hip) | 3.2 Definition | 3.3 Predictors excluded | 3.4 Similar definition | 3.5 Knowledge of predictor | 3.6 Interval | Risk of Bias       | Applicability | 4.1a No. outcomes (hip) | 4.1b No. outcomes (CFF) | 4.2 Predictor handling | 4.3 Missing participants | 4.4 Deaths/competing risk | 4.5 Complexities in data | 4.6a Performance data (hip) | 4.6b Calibration plots (hip) | 4.6c Performance data (CFF) | 4.6d Calibration plots (CFF) | Risk of Bias | Risk of Bias | Applicability |
| Lo 2011              | FRC    | Y                      | PY              | ●Low         | ●High         | Y                    | NI           | Y              | N                   | NI                | ●Unclear     | ●Low          | NA                       | Y                        | Y              | Y                       | Y                      | NI                         | PY           | ●Low               | ●Low          | Y                       | NA                      | Y                      | Y                        | Y                         | N                        | Y                           | PY                           | NA                          | NA                           | ●High        | ●High        | ●High         |
| Marques 2017         | FRAX   | Y                      | Y               | ●Low         | ●High         | Y                    | Y            | Y              | Y                   | Y                 | ●Low         | ●Low          | N                        | Y                        | Y              | Y                       | PY                     | Y                          | PN           | ●High              | ●Low          | N                       | Y                       | Y                      | N                        | Y                         | N                        | Y                           | N                            | Y                           | N                            | ●High        | ●High        | ●Unclear      |
| Melton 2012          | FRAX   | Y                      | Y               | ●Low         | ●Low          | Y                    | Y            | Y              | Y                   | NI                | ●Unclear     | ●Low          | Y                        | Y                        | Y              | Y                       | Y                      | NI                         | PY           | ●Unclear           | ●Low          | N                       | N                       | Y                      | Y                        | N                         | Y                        | N                           | N                            | Y                           | N                            | ●High        | ●High        | ●Low          |
| Pluskiewicz 2015     | FRAX   | Y                      | Y               | ●Low         | ●Low          | Y                    | NI           | Y              | Y                   | NI                | ●Unclear     | ●Low          | N                        | Y                        | Y              | Y                       | N                      | NI                         | N            | ●High              | ●Low          | N                       | N                       | PY                     | N                        | N                         | N                        | Y                           | N                            | Y                           | N                            | ●High        | ●High        | ●Low          |
|                      | Garvan | Y                      | Y               | ●Low         | ●Low          | Y                    | NI           | Y              | Y                   | NI                | ●Unclear     | ●Low          | N                        | Y                        | Y              | Y                       | N                      | NI                         | N            | ●High              | ●Low          | N                       | N                       | PY                     | N                        | N                         | N                        | Y                           | N                            | Y                           | N                            | ●High        | ●High        | ●Low          |
| Premaor 2013         | FRAX   | Y                      | Y               | ●Low         | ●Unclear      | Y                    | NI           | Y              | Y                   | N                 | ●High        | ●Low          | Y                        | Y                        | Y              | Y                       | Y                      | NI                         | PY           | ●Low               | ●Low          | Y                       | Y                       | N                      | Y                        | Y                         | N                        | Y                           | PY                           | Y                           | PY                           | ●High        | ●High        | ●Unclear      |
| Pressman 2011        | FRAX   | Y                      | PY              | ●Low         | ●High         | Y                    | NI           | Y              | N                   | NI                | ●Unclear     | ●Low          | NA                       | Y                        | Y              | Y                       | Y                      | NI                         | PY           | ●Low               | ●Low          | Y                       | NA                      | Y                      | Y                        | N                         | N                        | Y                           | N                            | NA                          | NA                           | ●High        | ●High        | ●High         |
| Reyes Dominguez 2019 | Garvan | Y                      | NI              | ●Unclear     | ●High         | NI                   | NI           | Y              | PY                  | NI                | ●Unclear     | ●Low          | N                        | Y                        | NI             | Y                       | Y                      | NI                         | Y            | ●High              | ●Low          | N                       | N                       | NI                     | N                        | Y                         | N                        | Y                           | N                            | Y                           | N                            | ●High        | ●High        | ●High         |
| Somay-Rendu 2010     | FRAX   | Y                      | PY              | ●Low         | ●Low          | Y                    | NI           | Y              | Y                   | NI                | ●Unclear     | ●Low          | Y                        | Y                        | Y              | Y                       | Y                      | NI                         | Y            | ●Low               | ●Low          | N                       | N                       | NI                     | Y                        | Y                         | Y                        | Y                           | N                            | Y                           | N                            | ●High        | ●High        | ●Low          |
| Tamaki 2011          | FRAX   | Y                      | Y               | ●Low         | ●Low          | Y                    | NI           | Y              | Y                   | NI                | ●Unclear     | ●Low          | PN                       | Y                        | Y              | Y                       | N                      | NI                         | Y            | ●High              | ●Low          | N                       | N                       | N                      | N                        | N                         | N                        | Y                           | PY                           | Y                           | PY                           | ●High        | ●High        | ●Unclear      |
| Tamaki 2019          | FRAX   | Y                      | Y               | ●Low         | ●Low          | Y                    | NI           | Y              | Y                   | NI                | ●Unclear     | ●Low          | N                        | NA                       | Y              | Y                       | Y                      | NI                         | Y            | ●High              | ●Low          | NA                      | N                       | N                      | N                        | N                         | N                        | NA                          | NA                           | Y                           | N                            | ●High        | ●High        | ●Unclear      |
| Tanaka 2010          | FRAX   | Y                      | Y               | ●Low         | ●Low          | PN                   | NI           | Y              | N                   | N                 | ●High        | ●Low          | NI                       | NA                       | Y              | Y                       | NI                     | NI                         | Y            | ●Unclear           | ●Low          | NA                      | N                       | PY                     | PY                       | N                         | N                        | NA                          | NA                           | Y                           | N                            | ●High        | ●High        | ●Low          |
|                      | FRISC  | Y                      | Y               | ●Low         | ●Low          | PY                   | NI           | Y              | N                   | N                 | ●High        | ●Low          | NI                       | NA                       | Y              | Y                       | NI                     | NI                         | Y            | ●Unclear           | ●Low          | NA                      | N                       | PY                     | PY                       | N                         | N                        | NA                          | NA                           | Y                           | N                            | ●High        | ●High        | ●Low          |
| Tebe Cordomi 2013    | FRAX   | Y                      | Y               | ●Low         | ●High         | Y                    | NI           | Y              | PY                  | NI                | ●Unclear     | ●Low          | N                        | NA                       | Y              | Y                       | N                      | NI                         | Y            | ●High              | ●Low          | NA                      | Y                       | NI                     | N                        | N                         | N                        | NA                          | NA                           | Y                           | PY                           | ●High        | ●High        | ●High         |
| Tremollieres 2010    | FRAX   | Y                      | Y               | ●Low         | ●High         | N                    | NI           | Y              | Y                   | NI                | ●Unclear     | ●Low          | Y                        | NA                       | Y              | Y                       | Y                      | NI                         | N            | ●High              | ●Low          | NA                      | N                       | PY                     | N                        | N                         | N                        | NA                          | NA                           | Y                           | N                            | ●High        | ●High        | ●High         |
| Yin 2016             | FRAX   | Y                      | Y               | ●Low         | ●High         | Y                    | NI           | Y              | N                   | N                 | ●High        | ●Low          | PN                       | Y                        | Y              | Y                       | Y                      | NI                         | Y            | ●Unclear           | ●Low          | Y                       | Y                       | PN                     | NI                       | N                         | N                        | Y                           | N                            | Y                           | PY                           | ●High        | ●High        | ●High         |

Risk of bias assessed using the PROBAST tool : Wolff RF, Moons KGM, Riley RD, Whiting PF, Westwood M, Collins GS, et al. PROBAST: A tool to assessed risk of bias and applicability of prediction model studies. Ann Intern Med. 2019;170:51-58.

NI = No Information; N = No; PN = Probably No; PY = Probably Yes; Y = Yes; CFF = Clinical fragility fracture

**Additional Table 7.2.** Risk of bias assessments for trials included for KQ3a on the benefits of pharmacologic treatments

| Study                               | Random sequence generation | Allocation concealment | Blinding – participants and personnel | Blinding – outcome assessment | Incomplete outcome data | Selective reporting | Other sources of bias | Overall   |
|-------------------------------------|----------------------------|------------------------|---------------------------------------|-------------------------------|-------------------------|---------------------|-----------------------|-----------|
| <b>Hip fractures</b>                |                            |                        |                                       |                               |                         |                     |                       |           |
| Ascott-Evans 2003                   | ● Low                      | ● Unclear              | ● Low                                 | ● Low                         | ● High                  | ● High              | ● Low                 | ● High    |
| Boonen 2012                         | ● Low                      | ● Unclear              | ● Low                                 | ● Low                         | ● Unclear               | ● Low               | ● Low                 | ● Unclear |
| Chesnut 1995                        | ● Low                      | ● Unclear              | ● Unclear                             | ● Unclear                     | ● Unclear               | ● High              | ● Low                 | ● High    |
| Cummings 1998                       | ● Low                      | ● Low                  | ● Low                                 | ● Low                         | ● Low                   | ● Unclear           | ● Low                 | ● Unclear |
| Cummings 2009                       | ● Low                      | ● Unclear              | ● Low                                 | ● Low                         | ● Unclear               | ● Low               | ● Low                 | ● Unclear |
| Grey 2009                           | ● Low                      | ● Low                  | ● Low                                 | ● Low                         | ● Low                   | ● High              | ● Low                 | ● High    |
| Grey 2014                           | ● Low                      | ● Low                  | ● Low                                 | ● Low                         | ● Low                   | ● High              | ● Low                 | ● High    |
| Hosking 1998                        | ● Unclear                  | ● Unclear              | ● Low                                 | ● Low                         | ● Low                   | ● Unclear           | ● Low                 | ● Unclear |
| Li 2005                             | ● Unclear                  | ● Unclear              | ● Unclear                             | ● Unclear                     | ● High                  | ● Unclear           | ● Low                 | ● High    |
| Liberman 1995                       | ● Unclear                  | ● Unclear              | ● Unclear                             | ● Unclear                     | ● Unclear               | ● Unclear           | ● Low                 | ● Unclear |
| McClung 2001                        | ● Unclear                  | ● Unclear              | ● Unclear                             | ● Unclear                     | ● High                  | ● Unclear           | ● Low                 | ● High    |
| Mortensen 1998                      | ● Low                      | ● Unclear              | ● Unclear                             | ● Unclear                     | ● High                  | ● High              | ● Low                 | ● High    |
| Orwoll 2012                         | ● Low                      | ● Low                  | ● Low                                 | ● Low                         | ● Low                   | ● High              | ● Low                 | ● High    |
| Pitale 2015                         | ● Unclear                  | ● Unclear              | ● Unclear                             | ● Unclear                     | ● Low                   | ● High              | ● Low                 | ● High    |
| Pols 1999                           | ● Unclear                  | ● Unclear              | ● Unclear                             | ● Unclear                     | ● Low                   | ● Unclear           | ● Low                 | ● Unclear |
| Reid 2018                           | ● Low                      | ● Low                  | ● Low                                 | ● Low                         | ● Low                   | ● Low               | ● Low                 | ● Low     |
| Välimäki 2007                       | ● Unclear                  | ● Unclear              | ● Low                                 | ● Low                         | ● Low                   | ● Unclear           | ● Low                 | ● Unclear |
| Yan 2009                            | ● Low                      | ● Unclear              | ● Unclear                             | ● Unclear                     | ● Unclear               | ● High              | ● Low                 | ● High    |
| Zhu 2017                            | ● Unclear                  | ● Unclear              | ● Low                                 | ● Low                         | ● Low                   | ● High              | ● Low                 | ● High    |
| <b>Clinical fragility fractures</b> |                            |                        |                                       |                               |                         |                     |                       |           |
| Ascott-Evans 2003                   | ● Low                      | ● Unclear              | ● Low                                 | ● Low                         | ● High                  | ● High              | ● Low                 | ● High    |
| Bell 2002                           | ● Unclear                  | ● Unclear              | ● Unclear                             | ● Unclear                     | ● High                  | ● High              | ● Low                 | ● High    |
| Bone 2008                           | ● Low                      | ● Unclear              | ● Unclear                             | ● Unclear                     | ● Unclear               | ● Unclear           | ● Low                 | ● Unclear |
| Boonen 2012                         | ● Low                      | ● Unclear              | ● Low                                 | ● Low                         | ● Unclear               | ● Low               | ● Low                 | ● Unclear |
| Chesnut 1995                        | ● Low                      | ● Unclear              | ● Unclear                             | ● Unclear                     | ● Unclear               | ● High              | ● Low                 | ● High    |
| Cummings 1998                       | ● Low                      | ● Low                  | ● Low                                 | ● Low                         | ● Low                   | ● Unclear           | ● Low                 | ● Unclear |
| Cummings 2009                       | ● Low                      | ● Unclear              | ● Low                                 | ● Low                         | ● Unclear               | ● Low               | ● Low                 | ● Unclear |
| Fogelman 2000                       | ● Low                      | ● Unclear              | ● Unclear                             | ● Unclear                     | ● High                  | ● Unclear           | ● Low                 | ● High    |
| Grey 2009                           | ● Low                      | ● Low                  | ● Low                                 | ● Low                         | ● Low                   | ● High              | ● Low                 | ● High    |
| Grey 2014                           | ● Low                      | ● Low                  | ● Low                                 | ● Low                         | ● Low                   | ● High              | ● Low                 | ● High    |
| Hooper 2005                         | ● Low                      | ● Low                  | ● Unclear                             | ● Unclear                     | ● Unclear               | ● Unclear           | ● Low                 | ● Unclear |
| Hosking 1998                        | ● Unclear                  | ● Unclear              | ● Low                                 | ● Low                         | ● Low                   | ● Unclear           | ● Low                 | ● Unclear |
| Hosking 2003                        | ● Low                      | ● Unclear              | ● Unclear                             | ● Unclear                     | ● Unclear               | ● Unclear           | ● Low                 | ● Unclear |



| Study                  | Random sequence generation | Allocation concealment | Blinding – participants and personnel | Blinding – outcome assessment | Incomplete outcome data | Selective reporting | Other sources of bias | Overall   |
|------------------------|----------------------------|------------------------|---------------------------------------|-------------------------------|-------------------------|---------------------|-----------------------|-----------|
| <b>Quality of life</b> |                            |                        |                                       |                               |                         |                     |                       |           |
| Cummings 2009          | ● Low                      | ● Unclear              | ● Low                                 | ● Low                         | ● Unclear               | ● Unclear           | ● Low                 | ● Unclear |

Risk of bias assessed using the Cochrane Risk of Bias Tool, v. 2011: Higgins JPT, Altman DG, Gøtzsche PC, Jüni P, Moher D, Oxman AD, et al. The Cochrane Collaboration's tool for assessing risk of bias in randomized trials. *BMJ*;2011;343:d5928.

<sup>a</sup>Mortality data are from the 5-year open-label extension (participants remained in originally randomized groups)

**Additional Table 7.3.** Quality appraisals of the systematic reviews included for KQ3b on the harms of pharmacologic treatments

| Systematic review                                                                   | Intervention <sup>a</sup> | Components of PICO | Protocol & deviations | Selection of designs | Comprehensive search | Duplicate selection | Duplication data extraction | Excluded studies | Study description | ROB appraisal <sup>b</sup> | Funding sources | Appropriate statistics | Impact of ROB on synthesis | Impact of ROB on results | Heterogeneity explained | Publication bias | Conflict of interest | Overall Confidence |
|-------------------------------------------------------------------------------------|---------------------------|--------------------|-----------------------|----------------------|----------------------|---------------------|-----------------------------|------------------|-------------------|----------------------------|-----------------|------------------------|----------------------------|--------------------------|-------------------------|------------------|----------------------|--------------------|
| <b>Any non-serious AE</b>                                                           |                           |                    |                       |                      |                      |                     |                             |                  |                   |                            |                 |                        |                            |                          |                         |                  |                      |                    |
| Davis 2016                                                                          | ALE                       | ● Yes              | ● Yes                 | ● Yes                | ● Yes                | ● Yes               | ● No                        | ● Yes            | ● Yes             | ● Yes                      | ● Yes           | ● No                   | ● No                       | ● No                     | ● No                    | ● No             | ● Yes                | Low                |
| Davis 2016                                                                          | RIS, ZOL                  | ● Yes              | ● Yes                 | ● Yes                | ● Yes                | ● Yes               | ● No                        | ● Yes            | ● Yes             | ● Yes                      | ● Yes           | ● Yes                  | ● Yes                      | ● No                     | ● Yes                   | ● No             | ● Yes                | Low                |
| Davis 2020                                                                          | DEN                       | ● Yes              | ● Yes                 | ● No                 | ● Yes                | ● No                | ● No                        | ● Yes            | ● Yes             | ● Yes                      | ● No            | NA                     | NA                         | ● No                     | ● Yes                   | NA               | ● Yes                | Low                |
| <b>Non-serious GI AE</b>                                                            |                           |                    |                       |                      |                      |                     |                             |                  |                   |                            |                 |                        |                            |                          |                         |                  |                      |                    |
| Crandall 2014                                                                       | ALE, DEN                  | ● Yes              | ● Yes                 | ● No                 | ● No                 | ● Yes               | ● No                        | ● No             | ● PYes            | ● No                       | ● No            | ● Yes                  | ● No                       | ● Yes                    | ● No                    | ● Yes            | ● Yes                | Low                |
| Crandall 2014                                                                       | RIS, ZOL                  | ● Yes              | ● Yes                 | ● No                 | ● No                 | ● Yes               | ● No                        | ● No             | ● PYes            | ● No                       | ● No            | ● Yes                  | ● No                       | ● No                     | ● No                    | ● No             | ● Yes                | Critically Low     |
| <b>Influenza-like symptoms</b>                                                      |                           |                    |                       |                      |                      |                     |                             |                  |                   |                            |                 |                        |                            |                          |                         |                  |                      |                    |
| Davis 2016                                                                          | ALE                       | ● Yes              | ● Yes                 | ● Yes                | ● Yes                | ● Yes               | ● No                        | ● Yes            | ● Yes             | ● Yes                      | ● Yes           | ● Yes                  | ● Yes                      | ● No                     | ● Yes                   | ● No             | ● Yes                | Low                |
| Crandall 2014                                                                       | ZOL                       | ● Yes              | ● Yes                 | ● No                 | ● No                 | ● Yes               | ● No                        | ● No             | ● PYes            | ● No                       | ● No            | ● Yes                  | ● Yes                      | ● Yes                    | ● Yes                   | ● Yes            | ● Yes                | Low                |
| <b>Influenza, Pharyngitis</b>                                                       |                           |                    |                       |                      |                      |                     |                             |                  |                   |                            |                 |                        |                            |                          |                         |                  |                      |                    |
| Davis 2016                                                                          | RIS                       | ● Yes              | ● Yes                 | ● Yes                | ● Yes                | ● Yes               | ● No                        | ● Yes            | ● Yes             | ● Yes                      | ● Yes           | NA                     | NA                         | ● No                     | ● Yes                   | ● No             | ● Yes                | Low                |
| <b>Pyrexia, Headache</b>                                                            |                           |                    |                       |                      |                      |                     |                             |                  |                   |                            |                 |                        |                            |                          |                         |                  |                      |                    |
| Davis 2016                                                                          | ZOL                       | ● Yes              | ● Yes                 | ● Yes                | ● Yes                | ● Yes               | ● No                        | ● Yes            | ● Yes             | ● Yes                      | ● Yes           | ● Yes                  | ● No                       | ● No                     | ● No                    | ● No             | ● Yes                | Low                |
| <b>Chills</b>                                                                       |                           |                    |                       |                      |                      |                     |                             |                  |                   |                            |                 |                        |                            |                          |                         |                  |                      |                    |
| Davis 2016                                                                          | ZOL                       | ● Yes              | ● Yes                 | ● Yes                | ● Yes                | ● Yes               | ● No                        | ● Yes            | ● Yes             | ● Yes                      | ● Yes           | ● Yes                  | ● No                       | ● No                     | ● Yes                   | ● No             | ● Yes                | Low                |
| <b>Musculoskeletal pain</b>                                                         |                           |                    |                       |                      |                      |                     |                             |                  |                   |                            |                 |                        |                            |                          |                         |                  |                      |                    |
| Diedhou 2015                                                                        | DEN                       | ● Yes              | ● No                  | ● No                 | ● No                 | ● No                | ● No                        | ● No             | ● Yes             | ● No                       | ● No            | NA                     | NA                         | ● No                     | ● Yes                   | NA               | ● Yes                | Critically Low     |
| <b>Arthritis and arthralgia</b>                                                     |                           |                    |                       |                      |                      |                     |                             |                  |                   |                            |                 |                        |                            |                          |                         |                  |                      |                    |
| Crandall 2014                                                                       | ALE, RIS, ZOL             | ● Yes              | ● Yes                 | ● No                 | ● No                 | ● Yes               | ● No                        | ● No             | ● PYes            | ● No                       | ● No            | ● No                   | ● No                       | ● No                     | ● No                    | ● No             | ● Yes                | Critically Low     |
| <b>Myalgias, cramps, or limb pain</b>                                               |                           |                    |                       |                      |                      |                     |                             |                  |                   |                            |                 |                        |                            |                          |                         |                  |                      |                    |
| Crandall 2014                                                                       | ALE, ZOL                  | ● Yes              | ● Yes                 | ● No                 | ● No                 | ● Yes               | ● No                        | ● No             | ● PYes            | ● No                       | ● No            | ● No                   | ● No                       | ● No                     | ● No                    | ● No             | ● Yes                | Critically Low     |
| Crandall 2014                                                                       | RIS                       | ● Yes              | ● Yes                 | ● No                 | ● No                 | ● Yes               | ● No                        | ● No             | ● PYes            | ● No                       | ● No            | NA                     | NA                         | ● Yes                    | ● Yes                   | ● No             | ● Yes                | Critically Low     |
| <b>Composite: arthralgia, myalgia, pyrexia, chills, and influenza-like symptoms</b> |                           |                    |                       |                      |                      |                     |                             |                  |                   |                            |                 |                        |                            |                          |                         |                  |                      |                    |
| Crandall 2014                                                                       | ZOL                       | ● Yes              | ● Yes                 | ● No                 | ● No                 | ● Yes               | ● No                        | ● No             | ● PYes            | ● No                       | ● No            | ● Yes                  | ● Yes                      | ● Yes                    | ● Yes                   | ● Yes            | ● Yes                | Low                |
| <b>Infections</b>                                                                   |                           |                    |                       |                      |                      |                     |                             |                  |                   |                            |                 |                        |                            |                          |                         |                  |                      |                    |
| Crandall 2014                                                                       | DEN                       | ● Yes              | ● Yes                 | ● No                 | ● Yes                | ● Yes               | ● No                        | ● No             | ● PYes            | ● No                       | ● No            | ● No                   | ● No                       | ● Yes                    | ● No                    | ● Yes            | ● Yes                | Low                |
| <b>Dermatologic AE</b>                                                              |                           |                    |                       |                      |                      |                     |                             |                  |                   |                            |                 |                        |                            |                          |                         |                  |                      |                    |
| <b>Injection site reactions</b>                                                     |                           |                    |                       |                      |                      |                     |                             |                  |                   |                            |                 |                        |                            |                          |                         |                  |                      |                    |
| Crandall 2014                                                                       | DEN                       | ● Yes              | ● Yes                 | ● No                 | ● Yes                | ● Yes               | ● No                        | ● No             | ● PYes            | ● No                       | ● No            | NA                     | NA                         | ● Yes                    | ● Yes                   | ● Yes            | ● Yes                | Low                |

| Systematic review                                      | Intervention <sup>a</sup> | Components of PICO | Protocol & deviations | Selection of designs | Comprehensive search | Duplicate selection | Duplication data extraction | Excluded studies | Study description | ROB appraisal <sup>b</sup> | Funding sources | Appropriate statistics | Impact of ROB on synthesis | Impact of ROB on results | Heterogeneity explained | Publication bias | Conflict of interest | Overall Confidence |                |
|--------------------------------------------------------|---------------------------|--------------------|-----------------------|----------------------|----------------------|---------------------|-----------------------------|------------------|-------------------|----------------------------|-----------------|------------------------|----------------------------|--------------------------|-------------------------|------------------|----------------------|--------------------|----------------|
| <b>Rash/eczema</b>                                     |                           |                    |                       |                      |                      |                     |                             |                  |                   |                            |                 |                        |                            |                          |                         |                  |                      |                    |                |
| Crandall 2014                                          | DEN                       | ● Yes              | ● Yes                 | ● No                 | ● Yes                | ● Yes               | ● No                        | ● No             | ● PYes            | ● No                       | ● No            | ● Yes                  | ● Yes                      | ● Yes                    | ● Yes                   | ● Yes            | ● Yes                | ● Yes              | Low            |
| <b>Rash</b>                                            |                           |                    |                       |                      |                      |                     |                             |                  |                   |                            |                 |                        |                            |                          |                         |                  |                      |                    |                |
| Viswanathan 2018                                       | DEN                       | ● Yes              | ● Yes                 | ● No                 | ● Yes                | ● Yes               | ● No                        | ● No             | ● Yes             | ● Yes                      | ● No            | NA                     | NA                         | ● Yes                    | ● Yes                   | ● Yes            | ● Yes                | ● Yes              | Moderate       |
| <b>EczeMa</b>                                          |                           |                    |                       |                      |                      |                     |                             |                  |                   |                            |                 |                        |                            |                          |                         |                  |                      |                    |                |
| Viswanathan 2018                                       | DEN                       | ● Yes              | ● Yes                 | ● No                 | ● No                 | ● Yes               | ● No                        | ● Yes            | ● Yes             | ● Yes                      | ● No            | NA                     | NA                         | ● Yes                    | ● Yes                   | ● Yes            | ● Yes                | ● Yes              | Moderate       |
| <b>Any serious AE</b>                                  |                           |                    |                       |                      |                      |                     |                             |                  |                   |                            |                 |                        |                            |                          |                         |                  |                      |                    |                |
| Viswanathan 2018                                       | ALE, RIS, ZOL, DEN        | ● Yes              | ● Yes                 | ● No                 | ● No                 | ● Yes               | ● No                        | ● Yes            | ● Yes             | ● Yes                      | ● No            | ● Yes                  | ● Yes                      | ● Yes                    | ● Yes                   | ● Yes            | ● Yes                | ● Yes              | Moderate       |
| <b>Serious gastrointestinal AE (excluding cancers)</b> |                           |                    |                       |                      |                      |                     |                             |                  |                   |                            |                 |                        |                            |                          |                         |                  |                      |                    |                |
| Crandall 2014                                          | ALE, RIS                  | ● Yes              | ● Yes                 | ● No                 | ● No                 | ● Yes               | ● No                        | ● No             | ● PYes            | ● No                       | ● No            | ● Yes                  | ● No                       | ● No                     | ● Yes                   | ● No             | ● Yes                | ● Yes              | Critically Low |
| Crandall 2014                                          | ZOL, DEN                  | ● Yes              | ● Yes                 | ● No                 | ● No                 | ● Yes               | ● No                        | ● No             | ● PYes            | ● No                       | ● No            | NA                     | NA                         | ● Yes                    | ● Yes                   | ● No             | ● Yes                | ● Yes              | Critically Low |
| <b>GI perforation, ulcers, or bleeds</b>               |                           |                    |                       |                      |                      |                     |                             |                  |                   |                            |                 |                        |                            |                          |                         |                  |                      |                    |                |
| Crandall 2014                                          | ALE                       | ● Yes              | ● Yes                 | ● No                 | ● No                 | ● Yes               | ● No                        | ● No             | ● PYes            | ● No                       | ● No            | ● Yes                  | ● No                       | ● No                     | ● Yes                   | ● No             | ● Yes                | ● Yes              | Critically Low |
| Crandall 2014                                          | RIS                       | ● Yes              | ● Yes                 | ● No                 | ● No                 | ● Yes               | ● No                        | ● No             | ● PYes            | ● No                       | ● No            | ● No                   | ● No                       | ● No                     | ● No                    | ● No             | ● Yes                | ● Yes              | Critically Low |
| Crandall 2014                                          | ZOL, DEN                  | ● Yes              | ● Yes                 | ● No                 | ● No                 | ● Yes               | ● No                        | ● No             | ● PYes            | ● No                       | ● No            | NA                     | NA                         | ● Yes                    | ● Yes                   | ● No             | ● Yes                | ● Yes              | Critically Low |
| <b>Serious esophageal AE</b>                           |                           |                    |                       |                      |                      |                     |                             |                  |                   |                            |                 |                        |                            |                          |                         |                  |                      |                    |                |
| Crandall 2014                                          | ALE, RIS                  | ● Yes              | ● Yes                 | ● No                 | ● No                 | ● Yes               | ● No                        | ● No             | ● PYes            | ● No                       | ● No            | ● No                   | ● No                       | ● No                     | ● No                    | ● No             | ● Yes                | ● Yes              | Critically Low |
| Crandall 2014                                          | ZOL, DEN                  | ● Yes              | ● Yes                 | ● No                 | ● No                 | ● Yes               | ● No                        | ● No             | ● PYes            | ● No                       | ● No            | NA                     | NA                         | ● Yes                    | ● Yes                   | ● No             | ● Yes                | ● Yes              | Critically Low |
| <b>Serious hepatobiliary AE</b>                        |                           |                    |                       |                      |                      |                     |                             |                  |                   |                            |                 |                        |                            |                          |                         |                  |                      |                    |                |
| Crandall 2014                                          | ALE, RIS, ZOL, DEN        | ● Yes              | ● Yes                 | ● No                 | ● No                 | ● Yes               | ● No                        | ● No             | ● PYes            | ● No                       | ● No            | NA                     | NA                         | ● Yes                    | ● Yes                   | ● No             | ● Yes                | ● Yes              | Critically Low |
| <b>GI cancer</b>                                       |                           |                    |                       |                      |                      |                     |                             |                  |                   |                            |                 |                        |                            |                          |                         |                  |                      |                    |                |
| Crandall 2014                                          | RIS                       | ● Yes              | ● Yes                 | ● No                 | ● No                 | ● Yes               | ● No                        | ● No             | ● PYes            | ● No                       | ● No            | NA                     | NA                         | ● No                     | ● Yes                   | ● No             | ● Yes                | ● Yes              | Critically Low |
| <b>Colon or colorectal</b>                             |                           |                    |                       |                      |                      |                     |                             |                  |                   |                            |                 |                        |                            |                          |                         |                  |                      |                    |                |
| Chen 2015                                              | ALE                       | ● Yes              | ● No                  | ● No                 | ● No                 | ● Yes               | ● No                        | ● Yes            | ● No              | ● Yes                      | ● No            | ● No                   | ● No                       | ● Yes                    | ● No                    | ● Yes            | ● Yes                | ● Yes              | Critically Low |
| Crandall 2014                                          | DEN                       | ● Yes              | ● Yes                 | ● No                 | ● No                 | ● Yes               | ● No                        | ● No             | ● PYes            | ● No                       | ● No            | NA                     | NA                         | ● Yes                    | ● Yes                   | ● No             | ● Yes                | ● Yes              | Low            |
| <b>Gastric</b>                                         |                           |                    |                       |                      |                      |                     |                             |                  |                   |                            |                 |                        |                            |                          |                         |                  |                      |                    |                |
| Chen 2015                                              | ALE                       | ● Yes              | ● No                  | ● No                 | ● No                 | ● Yes               | ● No                        | ● Yes            | ● No              | ● Yes                      | ● No            | ● Yes                  | ● Yes                      | ● Yes                    | ● Yes                   | ● Yes            | ● Yes                | ● Yes              | Critically Low |
| <b>Esophageal</b>                                      |                           |                    |                       |                      |                      |                     |                             |                  |                   |                            |                 |                        |                            |                          |                         |                  |                      |                    |                |
| Chen 2015                                              | ALE                       | ● Yes              | ● No                  | ● No                 | ● No                 | ● Yes               | ● No                        | ● Yes            | ● No              | ● Yes                      | ● No            | ● No                   | ● No                       | ● Yes                    | ● No                    | ● Yes            | ● Yes                | ● Yes              | Critically Low |
| Crandall 2014                                          | BIS                       | ● Yes              | ● Yes                 | ● No                 | ● No                 | ● Yes               | ● No                        | ● No             | ● PYes            | ● No                       | ● No            | NA                     | NA                         | ● No                     | ● Yes                   | ● No             | ● Yes                | ● Yes              | Low            |
| <b>Liver</b>                                           |                           |                    |                       |                      |                      |                     |                             |                  |                   |                            |                 |                        |                            |                          |                         |                  |                      |                    |                |

| Systematic review                          | Intervention <sup>a</sup> | Components of PICO | Protocol & deviations | Selection of designs | Comprehensive search | Duplicate selection | Duplication data extraction | Excluded studies | Study description | ROB appraisal <sup>b</sup> | Funding sources | Appropriate statistics | Impact of ROB on synthesis | Impact of ROB on results | Heterogeneity explained | Publication bias | Conflict of interest | Overall Confidence |
|--------------------------------------------|---------------------------|--------------------|-----------------------|----------------------|----------------------|---------------------|-----------------------------|------------------|-------------------|----------------------------|-----------------|------------------------|----------------------------|--------------------------|-------------------------|------------------|----------------------|--------------------|
| Chen 2015                                  | ALE                       | ● Yes              | ● No                  | ● No                 | ● No                 | ● Yes               | ● No                        | ● Yes            | ● No              | ● Yes                      | ● No            | ● No                   | ● No                       | ● Yes                    | ● No                    | ● Yes            | ● Yes                | Critically Low     |
| <b>Pancreas</b>                            |                           |                    |                       |                      |                      |                     |                             |                  |                   |                            |                 |                        |                            |                          |                         |                  |                      |                    |
| Chen 2015                                  | ALE                       | ● Yes              | ● No                  | ● No                 | ● No                 | ● Yes               | ● No                        | ● Yes            | ● No              | ● Yes                      | ● No            | ● No                   | ● No                       | ● Yes                    | ● Yes                   | ● Yes            | ● Yes                | Critically Low     |
| <b>Oral, bile duct, small intestine</b>    |                           |                    |                       |                      |                      |                     |                             |                  |                   |                            |                 |                        |                            |                          |                         |                  |                      |                    |
| Chen 2015                                  | ALE                       | ● Yes              | ● No                  | ● No                 | ● No                 | ● Yes               | ● No                        | ● Yes            | ● No              | ● Yes                      | ● No            | NA                     | NA                         | ● Yes                    | ● Yes                   | ● Yes            | ● Yes                | Critically Low     |
| <b>Serious cardiovascular AEs</b>          |                           |                    |                       |                      |                      |                     |                             |                  |                   |                            |                 |                        |                            |                          |                         |                  |                      |                    |
| Kranenburg 2016                            | BIS, ZOL                  | ● Yes              | ● No                  | ● No                 | ● PYes               | ● Yes               | ● Yes                       | ● No             | ● Yes             | ● PYes                     | ● No            | ● Yes                  | ● Yes                      | ● Yes                    | ● Yes                   | ● Yes            | ● Yes                | Low                |
| <b>Acute coronary syndrome</b>             |                           |                    |                       |                      |                      |                     |                             |                  |                   |                            |                 |                        |                            |                          |                         |                  |                      |                    |
| Crandall 2014                              | ALE, RIS, ZOL             | ● Yes              | ● Yes                 | ● No                 | ● No                 | ● Yes               | ● No                        | ● No             | ● PYes            | ● No                       | ● No            | ● No                   | ● No                       | ● No                     | ● No                    | ● No             | ● Yes                | Critically Low     |
| <b>Cerebrovascular events</b>              |                           |                    |                       |                      |                      |                     |                             |                  |                   |                            |                 |                        |                            |                          |                         |                  |                      |                    |
| Crandall 2014                              | ALE, RIS                  | ● Yes              | ● Yes                 | ● No                 | ● No                 | ● Yes               | ● No                        | ● No             | ● PYes            | ● No                       | ● No            | NA                     | NA                         | ● Yes                    | ● Yes                   | ● No             | ● Yes                | Critically Low     |
| Crandall 2014                              | ZOL                       | ● Yes              | ● Yes                 | ● No                 | ● No                 | ● Yes               | ● No                        | ● No             | ● PYes            | ● No                       | ● No            | ● No                   | ● No                       | ● No                     | ● No                    | ● No             | ● Yes                | Critically Low     |
| Crandall 2014                              | DEN                       | ● Yes              | ● Yes                 | ● No                 | ● No                 | ● Yes               | ● No                        | ● No             | ● PYes            | ● No                       | ● No            | NA                     | NA                         | ● No                     | ● Yes                   | ● No             | ● Yes                | Critically Low     |
| Davis 2020 (stroke)                        | DEN                       | ● Yes              | ● Yes                 | ● No                 | ● Yes                | ● No                | ● No                        | ● Yes            | ● Yes             | ● Yes                      | ● No            | NA                     | NA                         | ● No                     | ● Yes                   | NA               | ● Yes                | Low                |
| <b>Pulmonary embolism</b>                  |                           |                    |                       |                      |                      |                     |                             |                  |                   |                            |                 |                        |                            |                          |                         |                  |                      |                    |
| Crandall 2014                              | ALE, ZOL                  | ● Yes              | ● Yes                 | ● No                 | ● No                 | ● Yes               | ● No                        | ● No             | ● PYes            | ● No                       | ● No            | NA                     | NA                         | ● Yes                    | ● Yes                   | ● No             | ● Yes                | Critically Low     |
| <b>Thromboembolic events</b>               |                           |                    |                       |                      |                      |                     |                             |                  |                   |                            |                 |                        |                            |                          |                         |                  |                      |                    |
| Crandall 2014                              | ALE, RIS, ZOL             | ● Yes              | ● Yes                 | ● No                 | ● No                 | ● Yes               | ● No                        | ● No             | ● PYes            | ● No                       | ● No            | NA                     | NA                         | ● No                     | ● Yes                   | ● No             | ● Yes                | Critically Low     |
| Crandall 2014                              | DEN                       | ● Yes              | ● Yes                 | ● No                 | ● No                 | ● Yes               | ● No                        | ● No             | ● PYes            | ● No                       | ● No            | NA                     | NA                         | ● Yes                    | ● Yes                   | ● No             | ● Yes                | Critically Low     |
| Davis 2020 (venous thromboembolism)        | DEN                       | ● Yes              | ● Yes                 | ● No                 | ● Yes                | ● No                | ● No                        | ● Yes            | ● Yes             | ● Yes                      | ● No            | NA                     | NA                         | ● No                     | ● Yes                   | NA               | ● Yes                | Low                |
| <b>Cerebrovascular death</b>               |                           |                    |                       |                      |                      |                     |                             |                  |                   |                            |                 |                        |                            |                          |                         |                  |                      |                    |
| Crandall 2014                              | ALE, RIS, ZOL             | ● Yes              | ● Yes                 | ● No                 | ● No                 | ● Yes               | ● No                        | ● No             | ● PYes            | ● No                       | ● No            | ● No                   | ● No                       | ● No                     | ● No                    | ● No             | ● Yes                | Critically Low     |
| <b>Composite cardiovascular outcomes</b>   |                           |                    |                       |                      |                      |                     |                             |                  |                   |                            |                 |                        |                            |                          |                         |                  |                      |                    |
| Lv 2020                                    | DEN                       | ● Yes              | ● Yes                 | ● No                 | ● No                 | ● Yes               | ● Yes                       | ● Yes            | ● PYes            | ● Yes                      | ● No            | ● Yes                  | ● Yes                      | ● Yes                    | ● Yes                   | ● Yes            | ● Yes                | Moderate           |
| <b>Serious cardiac rhythm disturbances</b> |                           |                    |                       |                      |                      |                     |                             |                  |                   |                            |                 |                        |                            |                          |                         |                  |                      |                    |
| <b>Atrial fibrillation</b>                 |                           |                    |                       |                      |                      |                     |                             |                  |                   |                            |                 |                        |                            |                          |                         |                  |                      |                    |
| Viswanathan 2018                           | BIS                       | ● Yes              | ● Yes                 | ● No                 | ● No                 | ● Yes               | ● No                        | ● Yes            | ● Yes             | ● Yes                      | ● No            | NA                     | NA                         | ● Yes                    | ● Yes                   | NA               | ● Yes                | Moderate           |
| Crandall 2014                              | ALE, RIS                  | ● Yes              | ● Yes                 | ● No                 | ● No                 | ● Yes               | ● No                        | ● No             | ● PYes            | ● No                       | ● No            | NA                     | NA                         | ● Yes                    | ● Yes                   | ● Yes            | ● Yes                | Low                |
| Crandall 2014                              | ZOL                       | ● Yes              | ● Yes                 | ● No                 | ● No                 | ● Yes               | ● No                        | ● No             | ● PYes            | ● No                       | ● No            | ● No                   | ● No                       | ● Yes                    | ● No                    | ● Yes            | ● Yes                | Low                |

| Systematic review                                 | Intervention <sup>a</sup>       | Components of PICO | Protocol & deviations | Selection of designs | Comprehensive search | Duplicate selection | Duplication data extraction | Excluded studies | Study description | ROB appraisal <sup>b</sup> | Funding sources | Appropriate statistics | Impact of ROB on synthesis | Impact of ROB on results | Heterogeneity explained | Publication bias | Conflict of interest | Overall Confidence |
|---------------------------------------------------|---------------------------------|--------------------|-----------------------|----------------------|----------------------|---------------------|-----------------------------|------------------|-------------------|----------------------------|-----------------|------------------------|----------------------------|--------------------------|-------------------------|------------------|----------------------|--------------------|
| Crandall 2014                                     | DEN                             | ● Yes              | ● Yes                 | ● No                 | ● No                 | ● Yes               | ● No                        | ● No             | ● PYes            | ● No                       | ● No            | NA                     | NA                         | ● No                     | ● Yes                   | ● No             | ● Yes                | Critically Low     |
| <b>Atypical femoral fractures</b>                 |                                 |                    |                       |                      |                      |                     |                             |                  |                   |                            |                 |                        |                            |                          |                         |                  |                      |                    |
| Crandall 2014                                     | BIS                             | ● Yes              | ● Yes                 | ● No                 | ● No                 | ● Yes               | ● No                        | ● No             | ● PYes            | ● No                       | ● No            | NA                     | NA                         | ● Yes                    | ● Yes                   | ● Yes            | ● Yes                | Low                |
| Fink 2019                                         | ALE, ZOL, DEN (LT) <sup>c</sup> | ● Yes              | ● Yes                 | ● No                 | ● No                 | ● Yes               | ● No                        | ● Yes            | ● Yes             | ● Yes                      | ● Yes           | NA                     | NA                         | ● Yes                    | ● Yes                   | ● Yes            | ● Yes                | Moderate           |
| Davis 2020                                        | DEN                             | ● Yes              | ● Yes                 | ● No                 | ● Yes                | ● No                | ● No                        | ● Yes            | ● Yes             | ● Yes                      | ● No            | NA                     | NA                         | ● No                     | ● Yes                   | NA               | ● Yes                | Low                |
| <b>Osteonecrosis of the jaw</b>                   |                                 |                    |                       |                      |                      |                     |                             |                  |                   |                            |                 |                        |                            |                          |                         |                  |                      |                    |
| Crandall 2014                                     | BIS                             | ● Yes              | ● Yes                 | ● No                 | ● No                 | ● Yes               | ● No                        | ● No             | ● PYes            | ● No                       | ● No            | NA                     | NA                         | ● Yes                    | ● Yes                   | ● Yes            | ● Yes                | Low                |
| Fink 2019                                         | BIS, ALE, ZOL (LT)              | ● Yes              | ● Yes                 | ● No                 | ● No                 | ● Yes               | ● No                        | ● Yes            | ● Yes             | ● Yes                      | ● Yes           | NA                     | NA                         | ● Yes                    | ● Yes                   | ● Yes            | ● Yes                | Moderate           |
| Davis 2020                                        | DEN                             | ● Yes              | ● Yes                 | ● No                 | ● Yes                | ● No                | ● No                        | ● Yes            | ● Yes             | ● Yes                      | ● No            | NA                     | NA                         | ● No                     | ● Yes                   | NA               | ● Yes                | Low                |
| Fink 2019                                         | DEN (LT)                        | ● Yes              | ● Yes                 | ● No                 | ● No                 | ● Yes               | ● No                        | ● Yes            | ● Yes             | ● Yes                      | ● Yes           | NA                     | NA                         | ● Yes                    | ● Yes                   | ● Yes            | ● Yes                | Moderate           |
| <b>Discontinuation due to AE</b>                  |                                 |                    |                       |                      |                      |                     |                             |                  |                   |                            |                 |                        |                            |                          |                         |                  |                      |                    |
| Viswanathan 2018                                  | ALE                             | ● Yes              | ● Yes                 | ● No                 | ● No                 | ● Yes               | ● No                        | ● Yes            | ● Yes             | ● Yes                      | ● No            | ● Yes                  | ● Yes                      | ● Yes                    | ● Yes                   | ● Yes            | ● Yes                | Moderate           |
| Viswanathan 2018                                  | RIS                             | ● Yes              | ● Yes                 | ● No                 | ● No                 | ● Yes               | ● No                        | ● Yes            | ● Yes             | ● Yes                      | ● No            | ● Yes                  | ● Yes                      | ● Yes                    | ● Yes                   | ● Yes            | ● Yes                | Moderate           |
| Viswanathan 2018                                  | ZOL                             | ● Yes              | ● Yes                 | ● No                 | ● No                 | ● Yes               | ● No                        | ● Yes            | ● Yes             | ● Yes                      | ● No            | NA                     | NA                         | ● Yes                    | ● Yes                   | NA               | ● Yes                | Moderate           |
| Viswanathan 2018                                  | DEN                             | ● Yes              | ● Yes                 | ● No                 | ● No                 | ● Yes               | ● No                        | ● Yes            | ● Yes             | ● Yes                      | ● No            | ● Yes                  | ● Yes                      | ● Yes                    | ● Yes                   | ● Yes            | ● Yes                | Moderate           |
| <b>Rebound fractures after stopping treatment</b> |                                 |                    |                       |                      |                      |                     |                             |                  |                   |                            |                 |                        |                            |                          |                         |                  |                      |                    |
| Tsourdi 2020                                      | DEN                             | ● Yes              | ● No                  | ● Yes                | ● No                 | ● No                | ● No                        | ● No             | ● PYes            | ● No                       | ● No            | NA                     | NA                         | ● No                     | ● Yes                   | NA               | ● Yes                | Critically Low     |

Quality assessment performed using AMSTAR-2: Shea BJ, Reeves BC, Thuku M, Hamel C, Moran J, Moher D, et al. AMSTAR 2: A critical appraisal tool for systematic reviews that include randomized or non-randomised studies of healthcare interventions or both. BMJ. 2017;358:j4008.

ALE: alendronate; LT: long-term; DEN: denosumab; NA: not applicable (no meta-analysis); PYes: probably yes; RIS: risedronate; ZOL: zoledronic acid

<sup>a</sup> All interventions are compared to placebo, unless otherwise denoted

<sup>b</sup> Note that the following reviews assessed the risk of bias of their included studies, but these were not assessed by outcome (i.e., specifically for harms): Davis 2016, Davis 2020, Fink 2019, Viswanathan 2018.

<sup>c</sup> compared to no treatment

**Table 7.4.** Risk of bias of cohort studies included for KQ3b on harms of pharmacologic therapy

| Study                | Newcastle Ottawa Risk of Bias Domain   |                                                    |                                   |                                                        |                                                       |                                                |                              |                                             | Adequate follow-up? |
|----------------------|----------------------------------------|----------------------------------------------------|-----------------------------------|--------------------------------------------------------|-------------------------------------------------------|------------------------------------------------|------------------------------|---------------------------------------------|---------------------|
|                      | Was the exposed cohort representative? | Was the non-exposed cohort selected appropriately? | How was the exposure ascertained? | Was the outcome of interest present at start of study? | Does the study control for confounders (age + other)? | Does the study control for additional factors? | How is the outcome assessed? | Length of follow-up sufficient for outcome? |                     |
| Tripto-Shkolnik 2020 | Yes                                    | Yes                                                | Yes                               | No                                                     | No                                                    | No                                             | Yes                          | Yes                                         | Yes                 |

**Additional Table 7.5.** Risk of bias appraisals of the studies include for KQ4 on the acceptability of screening and/or treatment

| Study                      | Participant selection | Completeness of data        |                     |                           | Measurement instrument                    |                           |                                  |                               |                      | Participant understanding | Data analysis | Overall risk of bias |
|----------------------------|-----------------------|-----------------------------|---------------------|---------------------------|-------------------------------------------|---------------------------|----------------------------------|-------------------------------|----------------------|---------------------------|---------------|----------------------|
|                            |                       | Adequate participation rate | Losses to follow-up | Sample size justification | Valid, reliable, administered as intended | Outcome assessors blinded | Valid representation of benefits | Valid representation of harms | Timeframe sufficient |                           |               |                      |
| de Bekker-Grob 2008        | ● Low                 | ● Unclear                   | ● Unclear           | ● Unclear                 | ● Low                                     | NA                        | ● Low                            | ● Low                         | ● Low                | ● Unclear                 | ● Low         | ● Unclear            |
| Fuzzell 2020               | ● Low                 | ● Unclear                   | ● Low               | ● Unclear                 | ● Low                                     | NA                        | ● Low                            | ● Low                         | ● Low                | ● Unclear                 | ● Low         | ● Unclear            |
| Hudson 2011                | ● Low                 | ● High                      | ● Low               | ● Low                     | ● Low                                     | NA                        | ● Unclear                        | ● Low                         | ● Low                | ● Unclear                 | ● Low         | ● High               |
| Hudson 2012                | ● Low                 | ● High                      | ● Low               | ● Unclear                 | ● Low                                     | NA                        | ● Unclear                        | ● High                        | ● Low                | ● Unclear                 | ● Low         | ● High               |
| Kalluru 2017               | ● Low                 | ● Low                       | ● Low               | ● Low                     | ● Low                                     | ● Low                     | ● Unclear                        | ● High                        | ● Low                | ● Unclear                 | ● Low         | ● High               |
| LeBlanc 2015               | ● Low                 | ● Low                       | ● High              | ● Low                     | ● Low                                     | NA                        | ● Unclear                        | ● Low                         | ● Low                | ● Low                     | ● High        | ● High               |
| Liu 2020 & Billington 2019 | ● Low                 | ● Unclear                   | ● Low               | ● Unclear                 | ● Low                                     | NA                        | ● Unclear                        | ● Low                         | ● Low                | ● Low                     | ● Low         | ● Unclear            |
| Montori 2011               | ● Low                 | ● Low                       | ● Low               | ● Low                     | ● Low                                     | NA                        | ● Unclear                        | ● Low                         | ● Low                | ● Low                     | ● Low         | ● Unclear            |
| Neuner 2014                | ● Low                 | ● High                      | ● Low               | ● Unclear                 | ● Low                                     | NA                        | ● Low                            | ● Low                         | ● Low                | ● Unclear                 | ● Low         | ● High               |
| Sheridan 2016              | ● Low                 | ● High                      | ● Low               | ● Low                     | ● Low                                     | ● Low                     | ● Low                            | ● Low                         | ● Low                | ● Low                     | ● Low         | ● High               |
| Si 2019                    | ● Low                 | ● Low                       | ● Low               | ● Low                     | ● Low                                     | NA                        | ● Low                            | ● Low                         | ● Low                | ● Unclear                 | ● Low         | ● Unclear            |
| Smallwood 2017             | ● Low                 | ● Low                       | ● Low               | ● High                    | ● Low                                     | NA                        | ● High                           | ● Unclear                     | ● Low                | ● Low                     | ● High        | ● High               |

Risk of bias assessment informed by the risk of bias subdomains included within the GRADE guidance for assessing the certainty of evidence in studies of the importance of outcomes or values and preferences. We adapted the questions to be relevant to the assessment of acceptability: Zhang Y, Alonso-Coello P, Guyatt GH, Yepes-Nuñez JJ, Akl EA, Hazlewood G, et al. GRADE guidelines: 19. Assessing the certainty of evidence in the importance of outcomes or values and preferences – risk of bias and indirectness. *J Clin Epidemiol.* 2019;11:94-104.

NA=not applicable
